# Supplementary material for: Exhibition of the Brønsted acid–base character of a Schiff base in palladium(ii) complex formation: lithium complexation, fluxional properties and catalysis of Suzuki reactions in water
Source: Royal Society of Chemistry journal article supplement (doi:10.1039/c5dt00438a), 2015-01-01
Supplement: c5dt00438a1.pdf [file c5dt00438a1.pdf]

# An Exhibition of the Brønsted Acid-Base Character by a Schiff Base in Palladium(II) Complex Formation: Lithium Complex, Fluxional Property and Catalysis of Suzuki Reactions in Water

*Rajnish Kumar and Ganesan Mani\**

Department of Chemistry, Indian Institute of Technology – Kharagpur, Kharagpur, West Bengal,

India 721 302, Fax: +91 3222 282252, E-mail: [gmani@chem.iitkgp.ernet.in](mailto:gmani@chem.iitkgp.ernet.in).

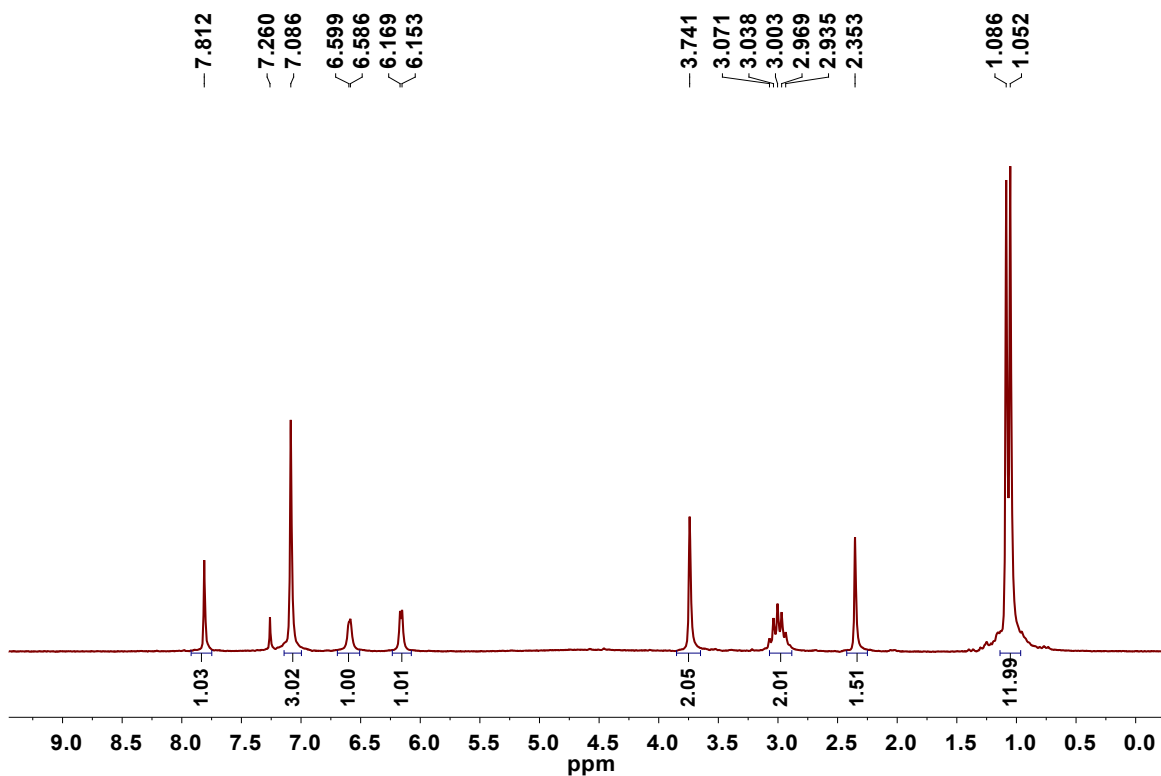

Figure S1.  $^1\text{H-NMR}$  spectrum of bis(iminopyrrolylmethyl)amine  $\text{H}_2\text{L}$  in  $\text{CDCl}_3$ .

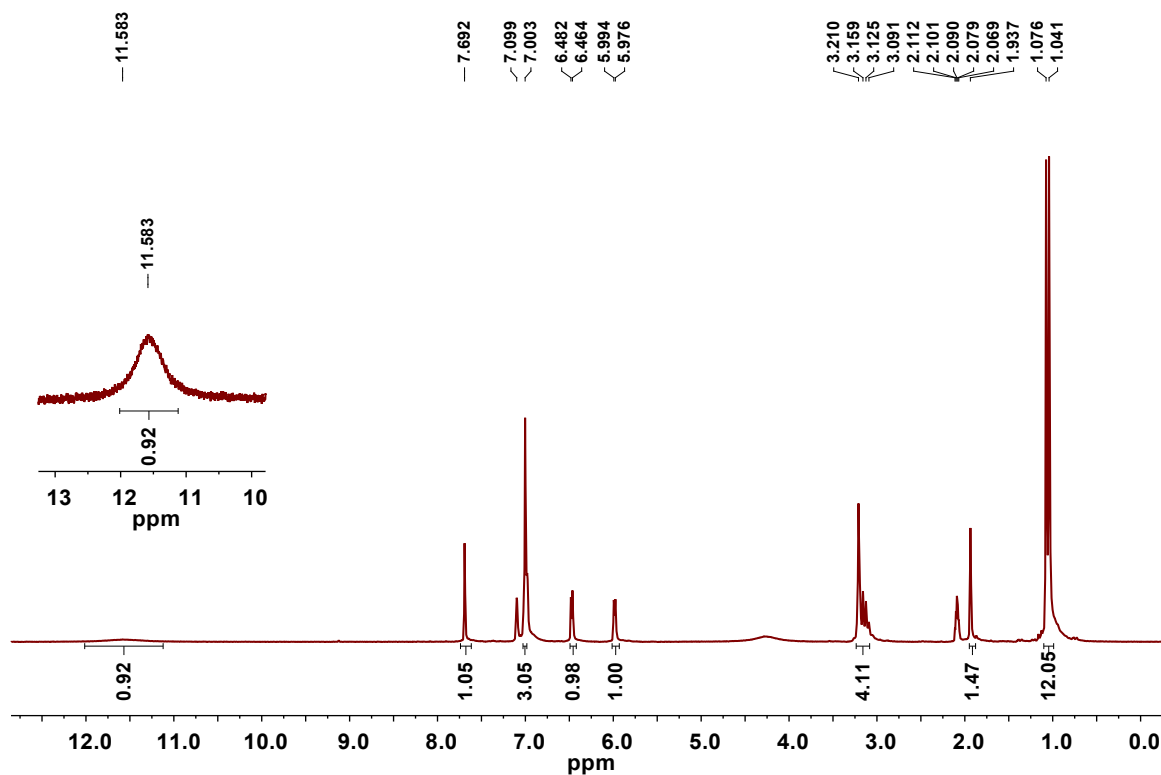

Figure S2.  $^1\text{H-NMR}$  spectrum of bis(iminopyrrolylmethyl)amine  $\text{H}_2\text{L}$  in  $\text{toluene-}d_8$ . The broad peak round  $\delta$  4.25 ppm is probably due to water.

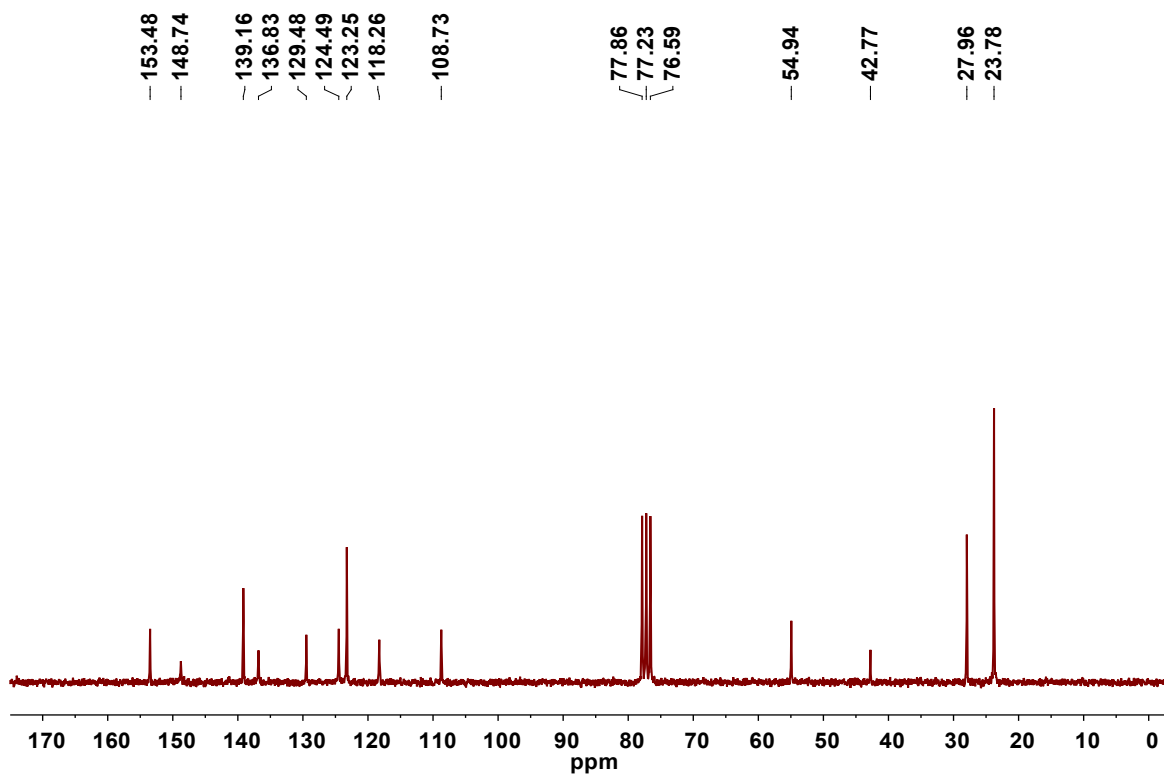

Figure S3.  $^{13}\text{C}\{^1\text{H}\}$ -NMR spectrum of bis(iminopyrrolylmethyl)amine  $\text{H}_2\text{L}$  in  $\text{CDCl}_3$ .

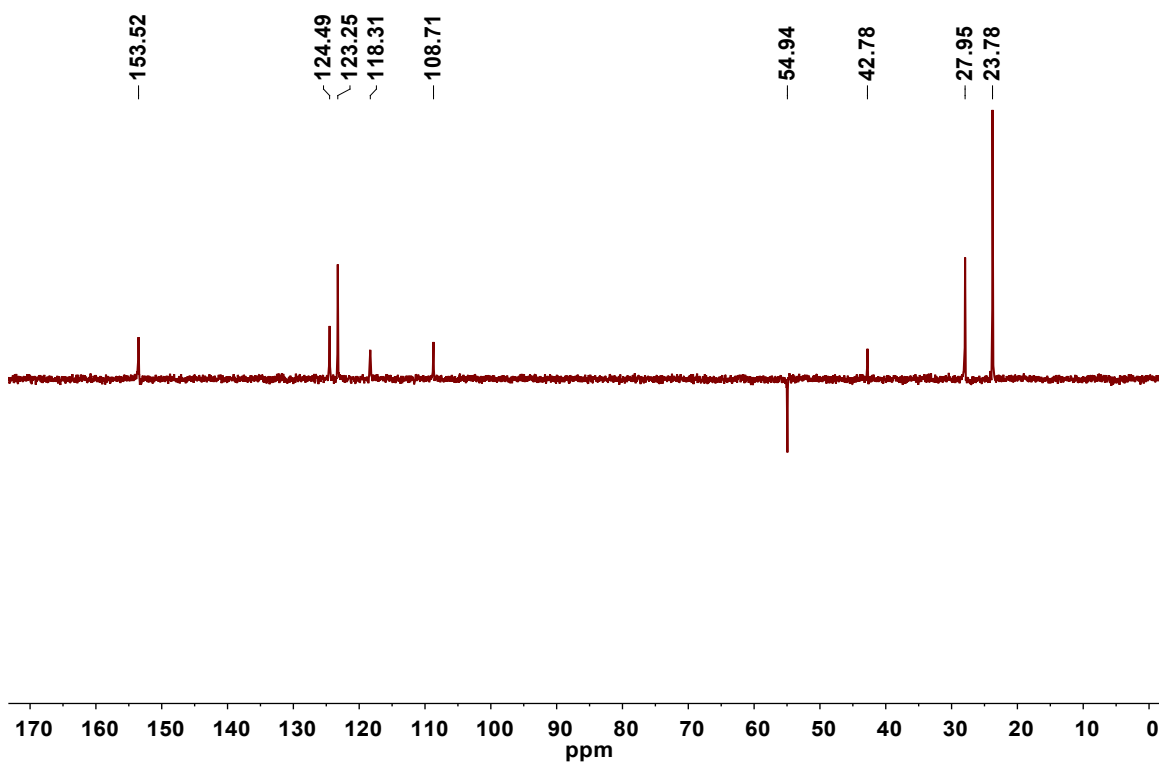

Figure S4. DEPT $\{^1\text{H}\}$ -135 NMR spectrum of bis(iminopyrrolylmethyl)amine  $\text{H}_2\text{L}$  in  $\text{CDCl}_3$ .

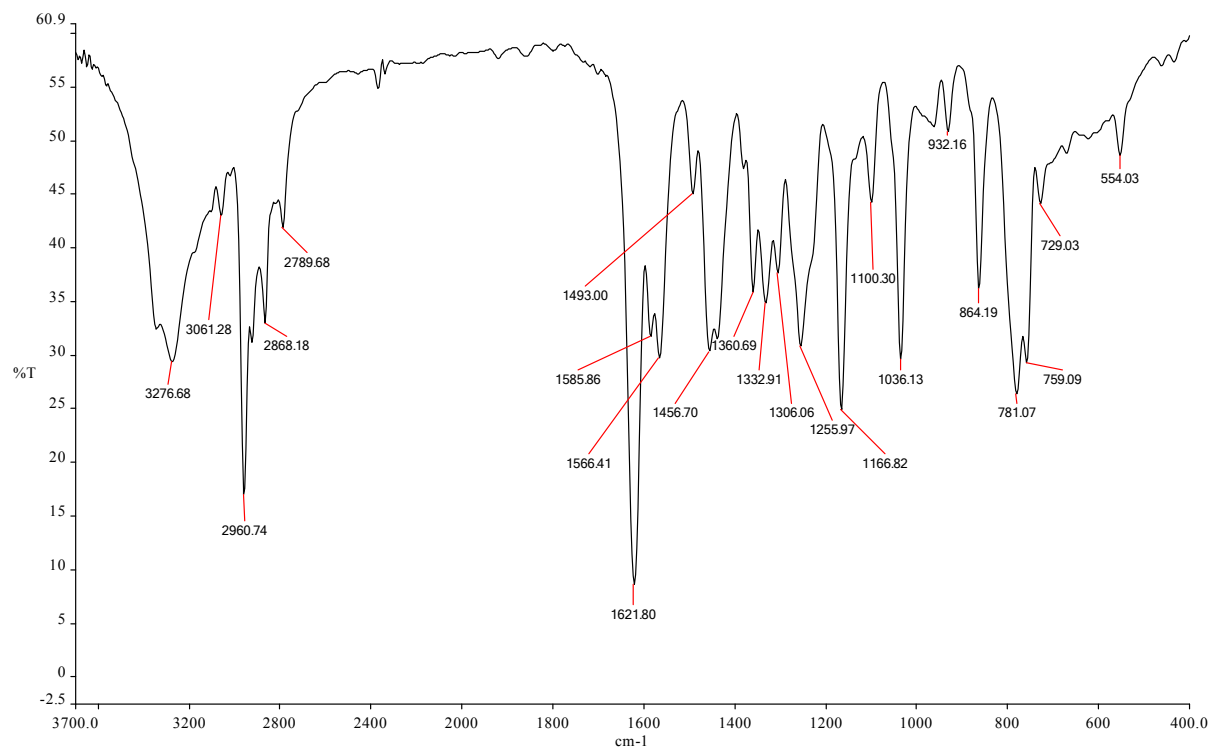

Figure S5: FTIR spectrum of bis(iminopyrrolylmethyl)amine  $H_2L$  recorded as a KBr disc.

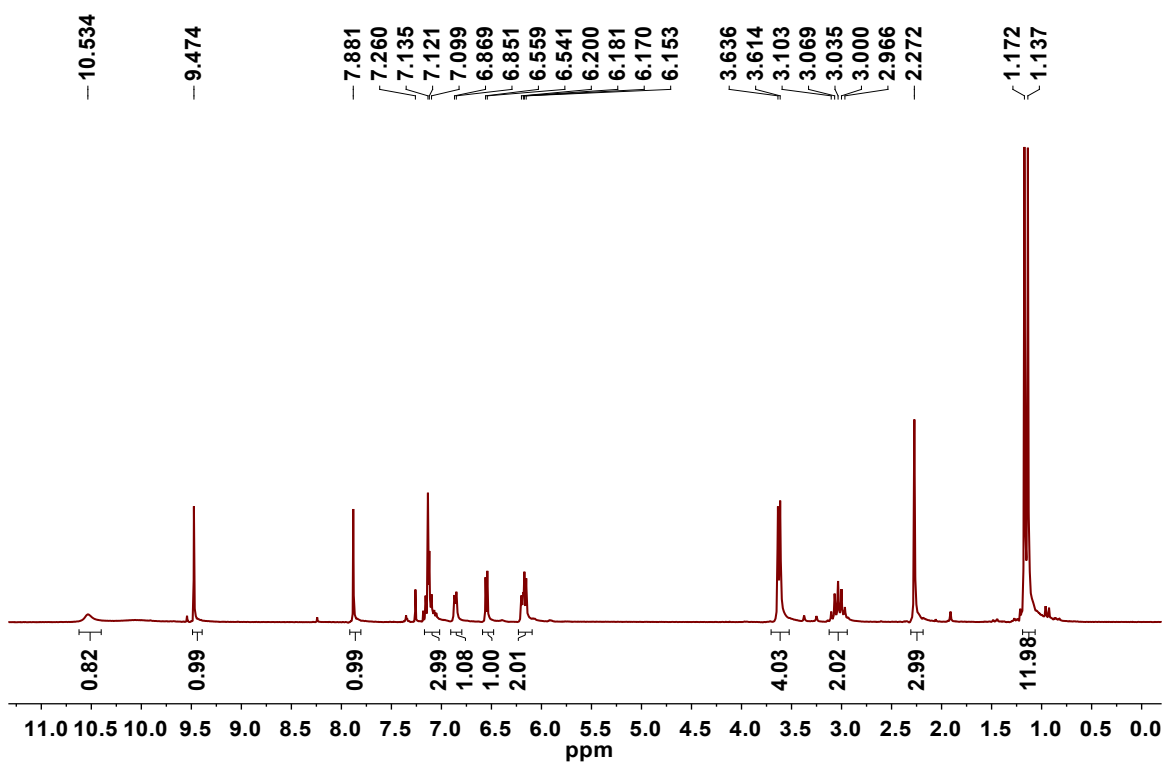

Figure S6.  $^1H$ -NMR spectrum of the monoimino compound  $H_2L'$  in  $CDCl_3$ .

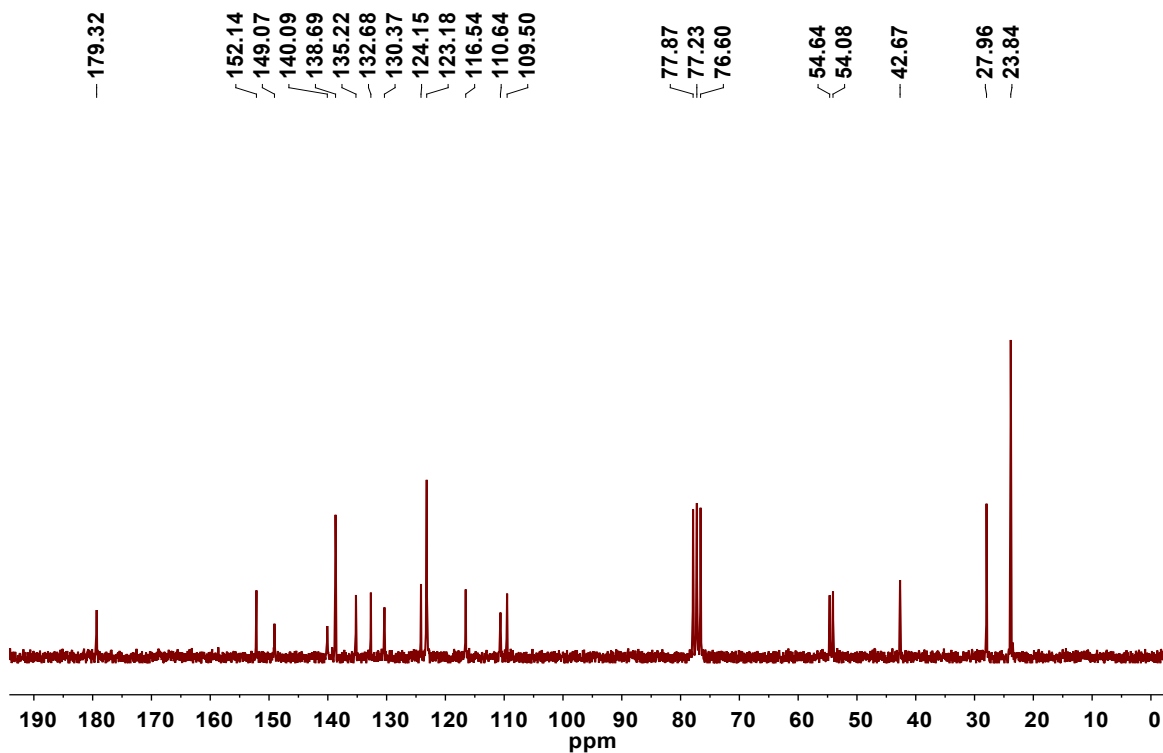

Figure S7.  $^{13}\text{C}\{^1\text{H}\}$ -NMR spectrum of the monoimino compound  $\text{H}_2\text{L}'$  in  $\text{CDCl}_3$ .

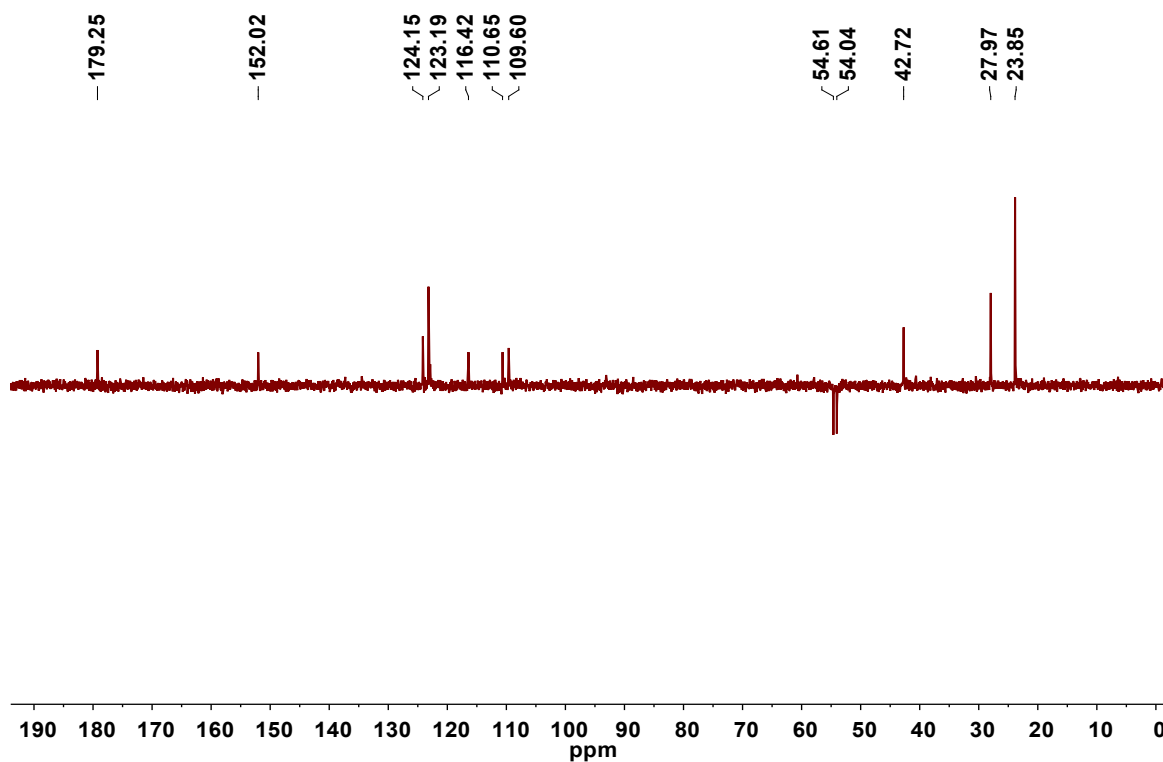

Figure S8. DEPT $\{^1\text{H}\}$ -135 NMR spectrum of the monoimino compound  $\text{H}_2\text{L}'$  in  $\text{CDCl}_3$ .

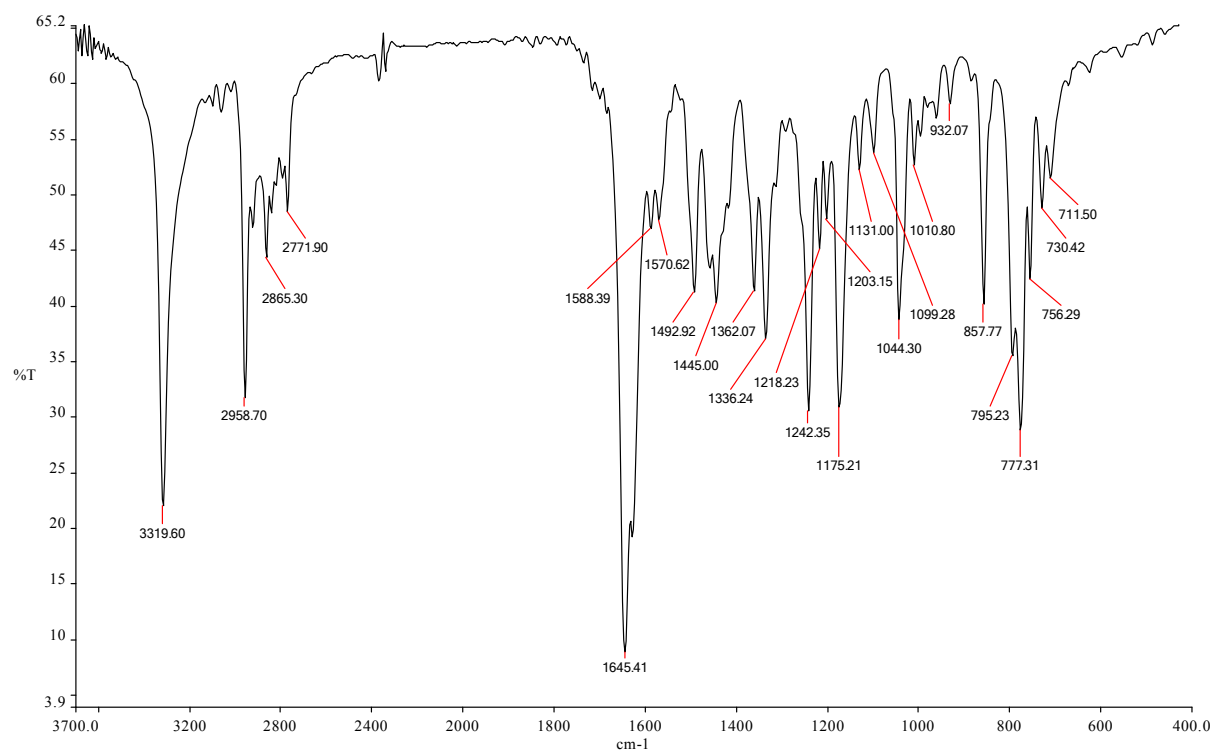

**Figure S9:** FTIR spectrum of the monoimino compound  $H_2L'$  recorded as a KBr disc.

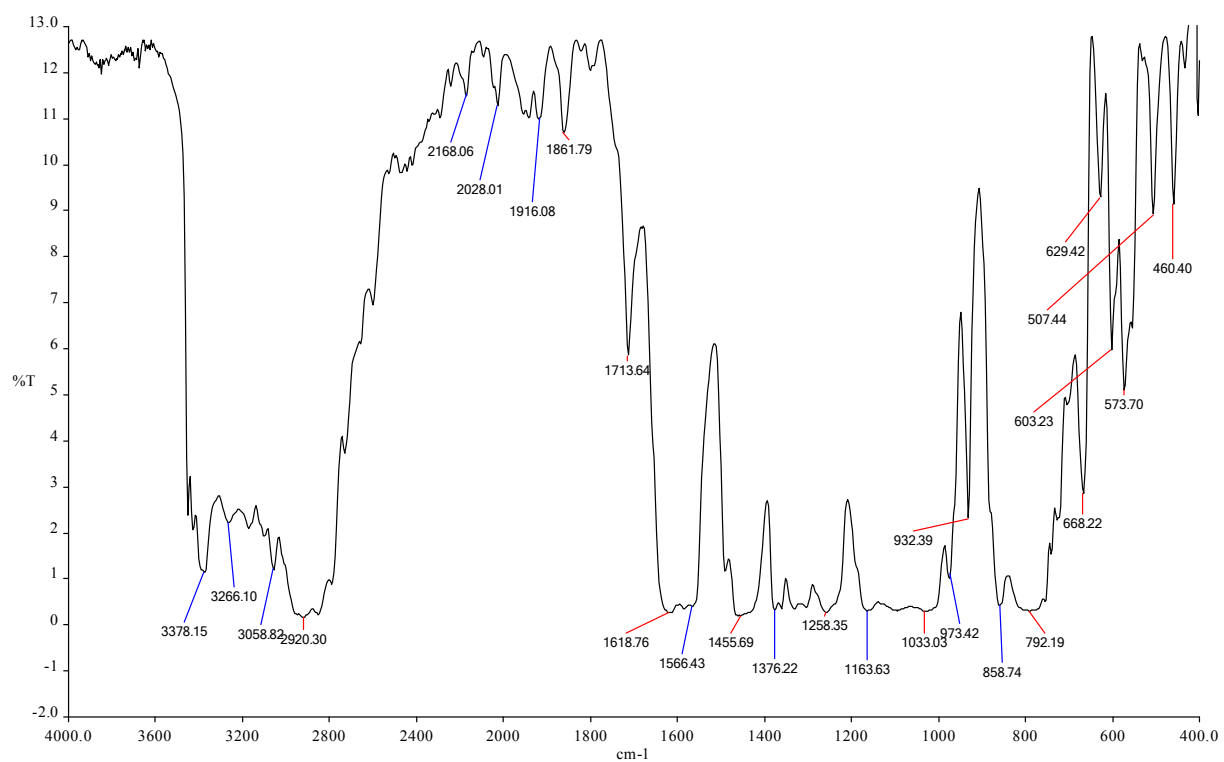

**Figure S10:** FTIR spectrum of the dimeric lithium complex **2** recorded as a Nujol mull.

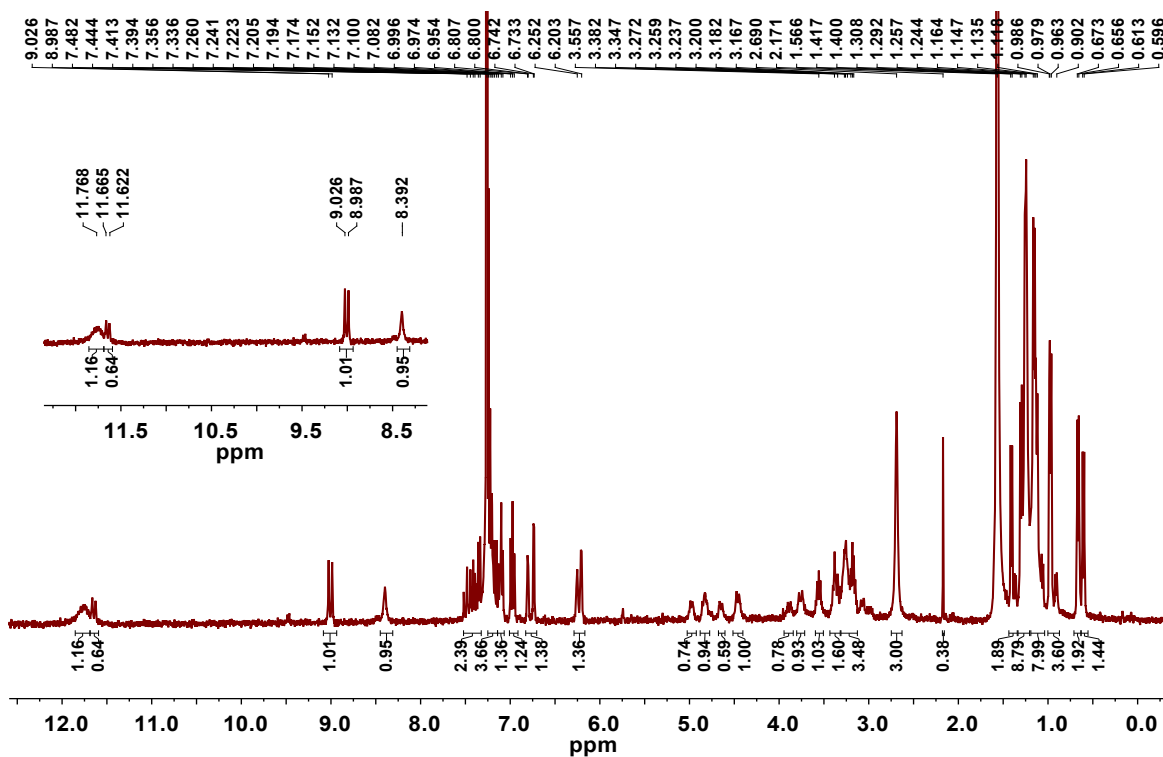

Figure S11.  $^1\text{H-NMR}$  spectrum of the cationic Pd(II) complex **3** in  $\text{CDCl}_3$ .

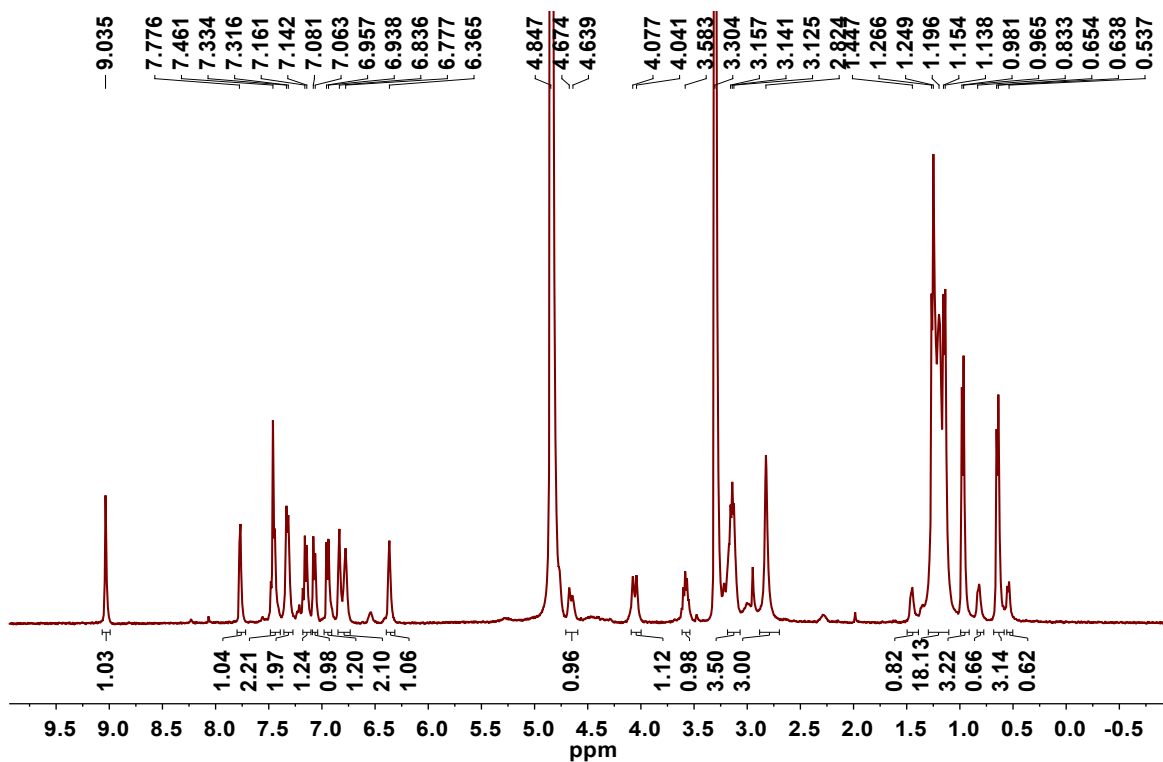

Figure S12.  $^1\text{H-NMR}$  spectrum of the cationic Pd(II) complex **3** in methanol- $d_4$ .

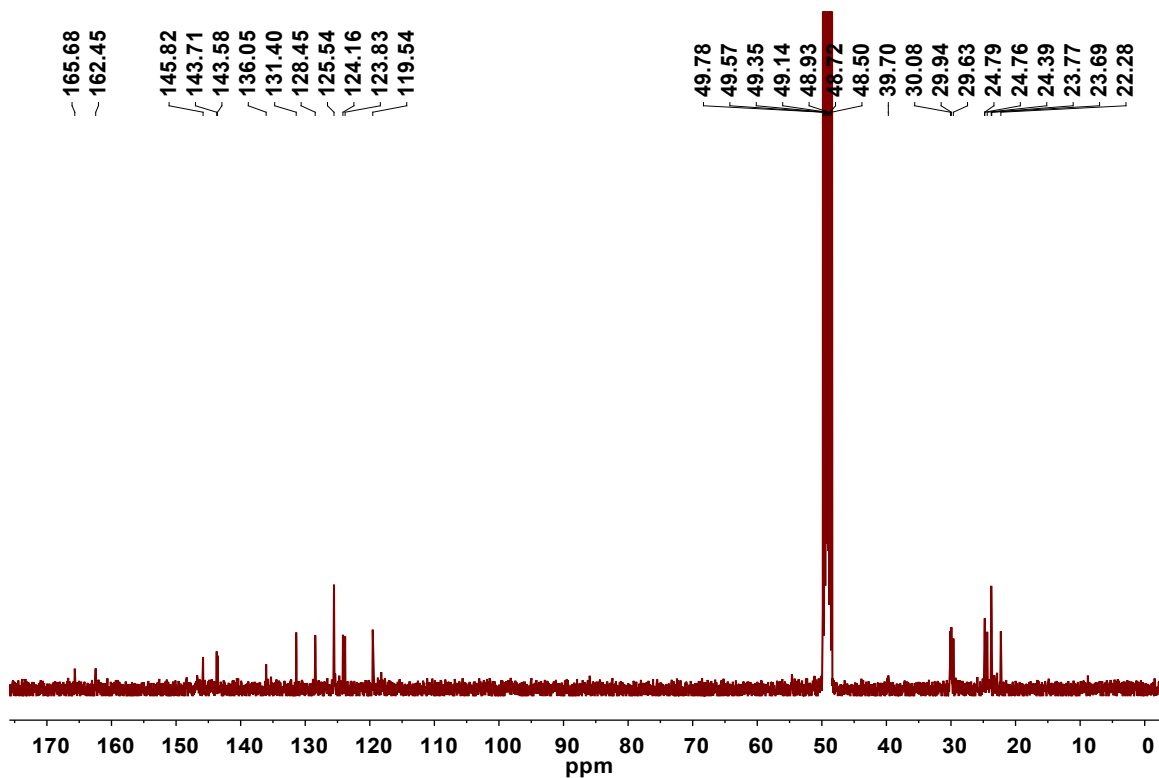

Figure S13.  $^{13}\text{C}\{^1\text{H}\}$ -NMR spectrum of the cationic Pd(II) complex **3** in methanol- $d_4$ .

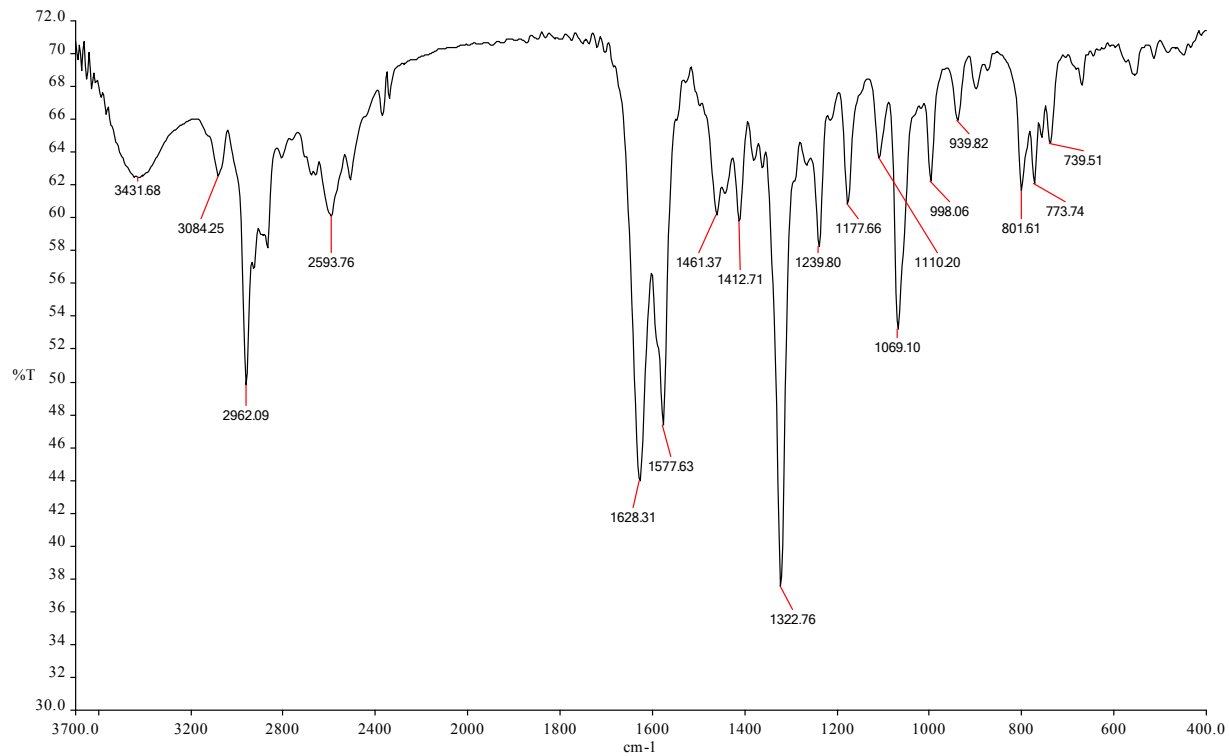

Figure S14: FTIR spectrum of the cationic Pd(II) complex **3** recorded as a KBr disc.



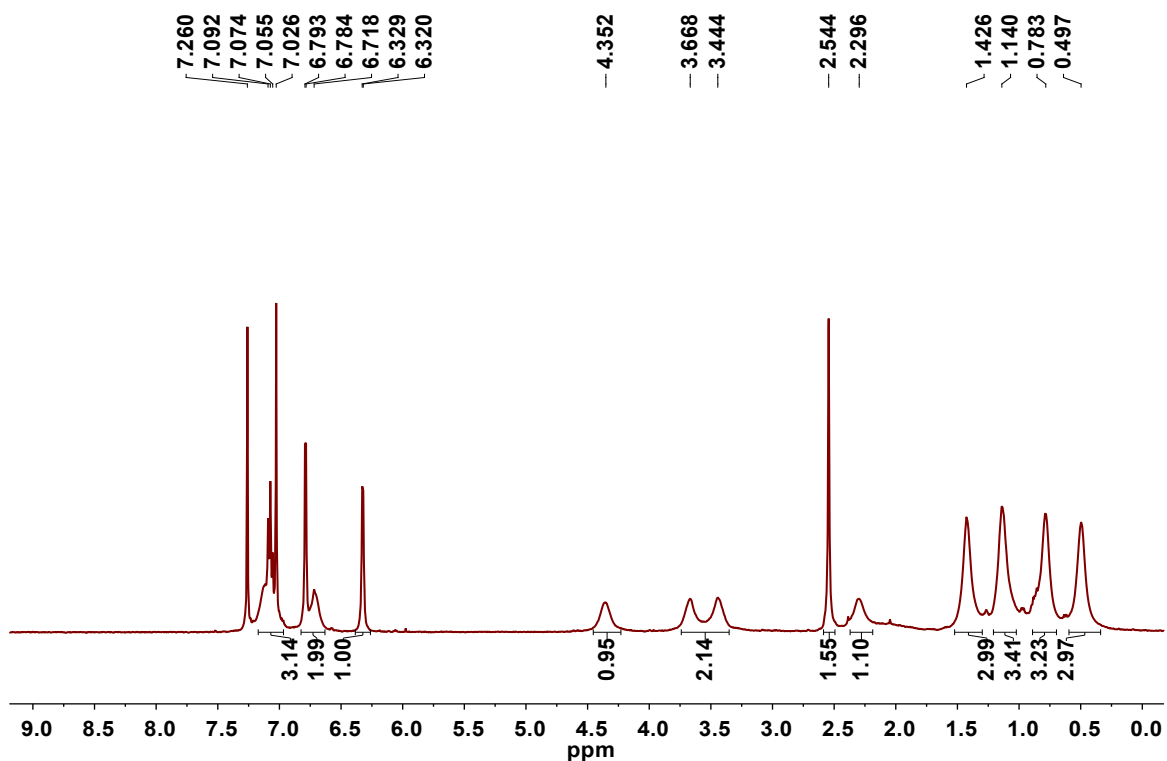

Figure S15.  $^1\text{H-NMR}$  spectrum of the neutral Pd(II) complex **4** in  $\text{CDCl}_3$  at 23 °C.

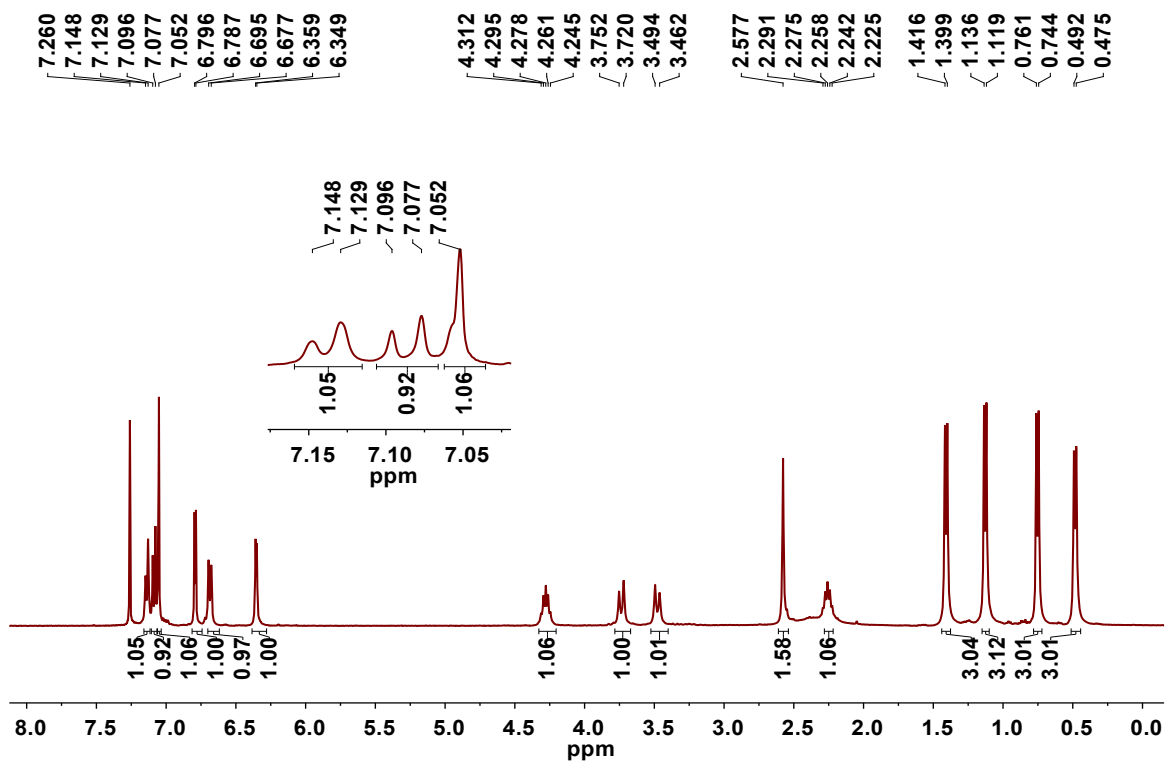

Figure S16.  $^1\text{H-NMR}$  spectrum of the neutral Pd(II) complex **4** in  $\text{CDCl}_3$  at 0 °C.

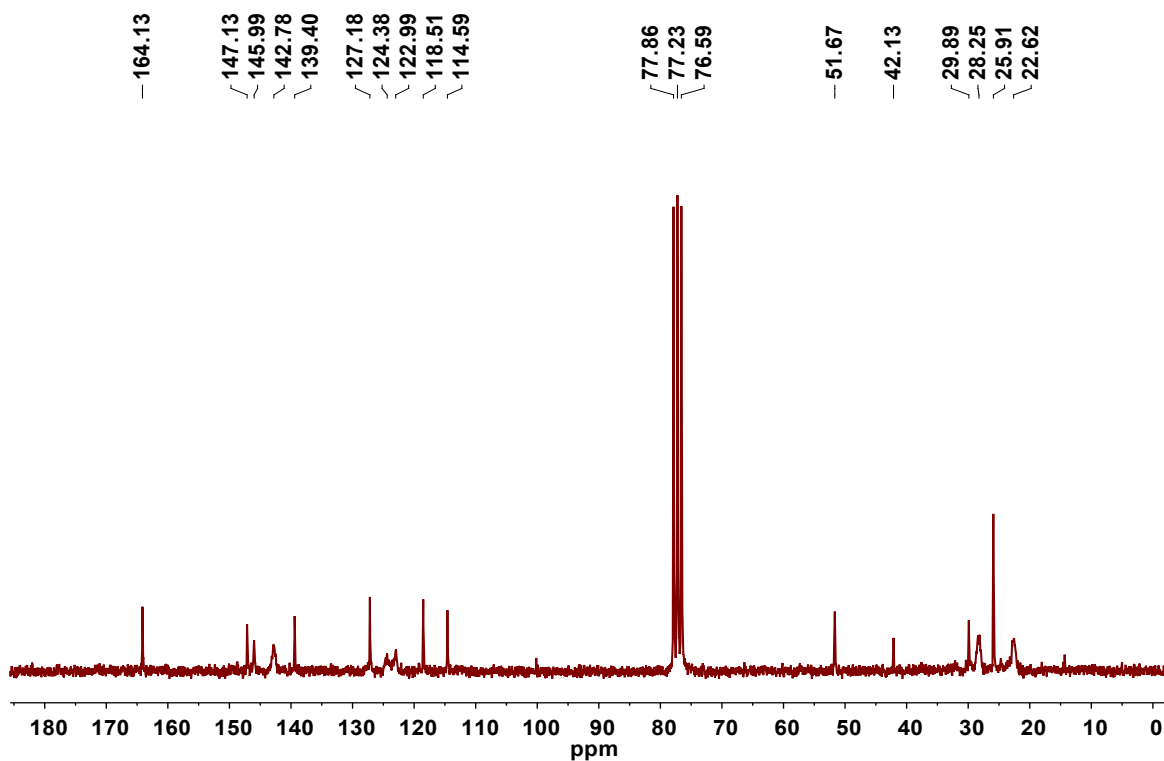

Figure S17.  $^{13}\text{C}\{^1\text{H}\}$ -NMR spectrum of the neutral Pd(II) complex **4** in  $\text{CDCl}_3$ .

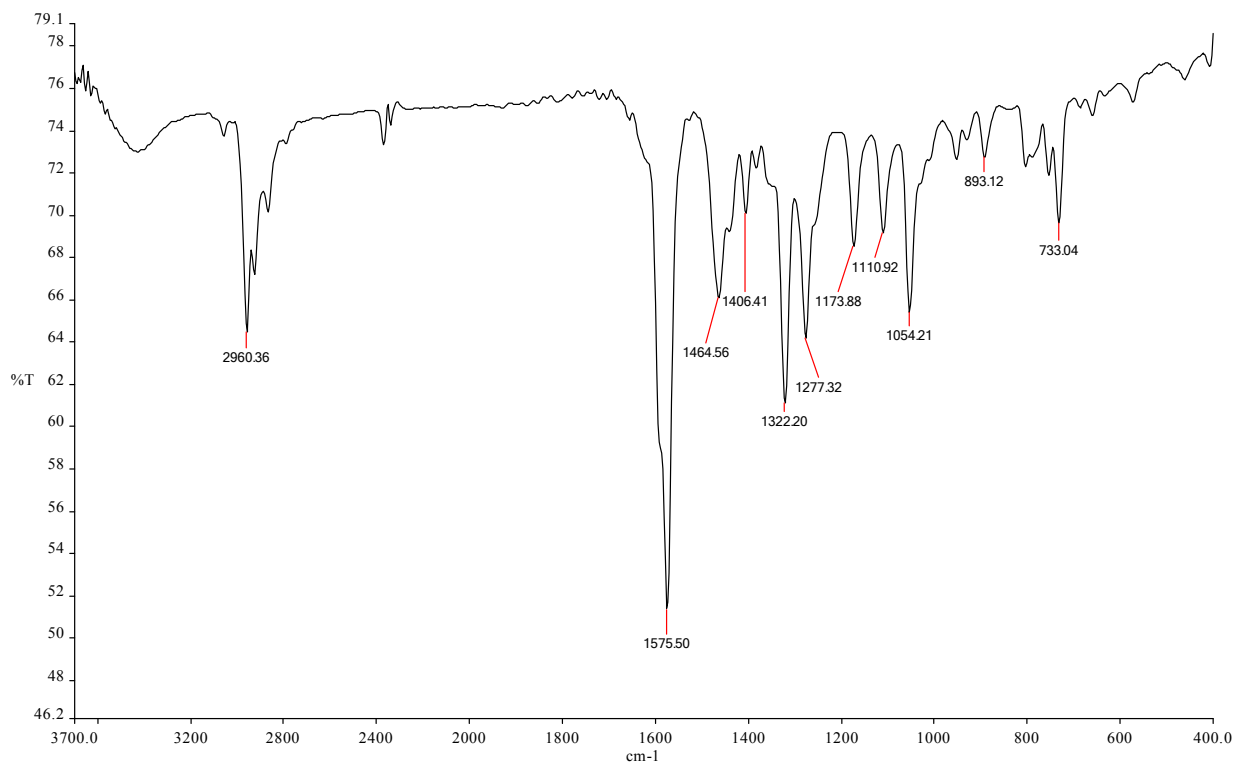

Figure S18: FTIR spectrum of the neutral Pd(II) complex **4** recorded as a KBr disc.

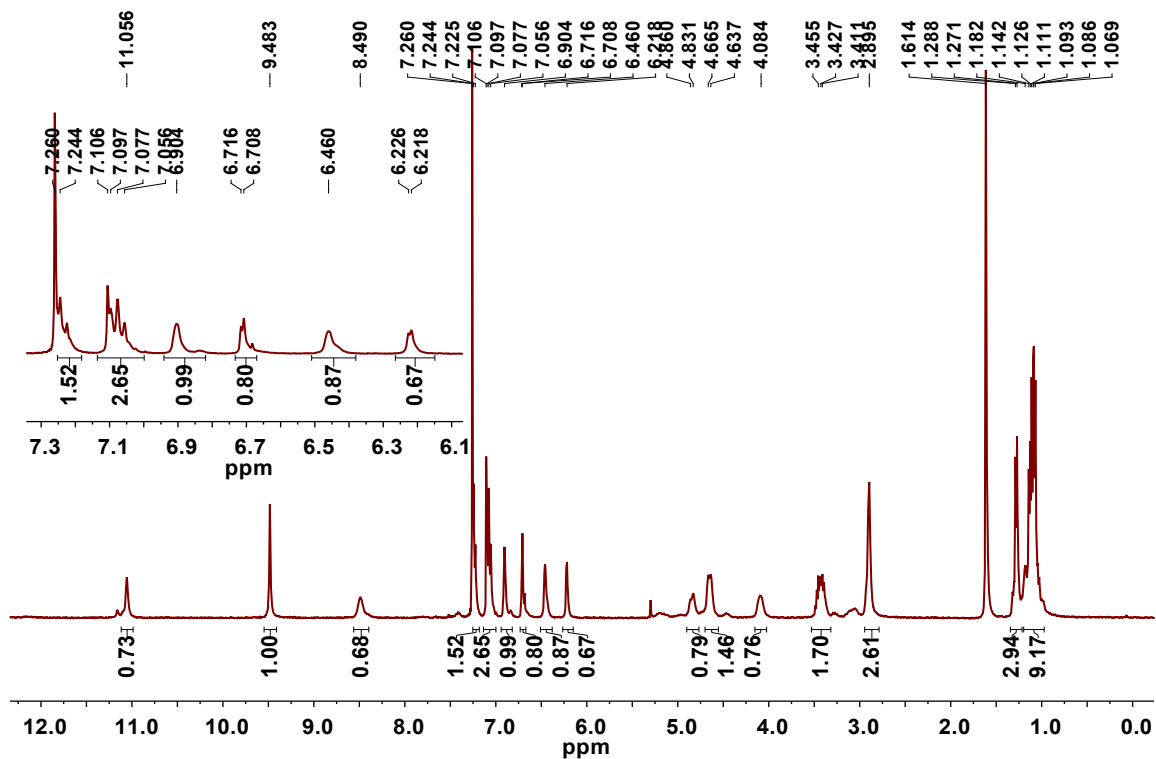

Figure S19.  $^1\text{H}$ -NMR spectrum of the zwitterionic Pd(II) complex **5** in  $\text{CDCl}_3$ .

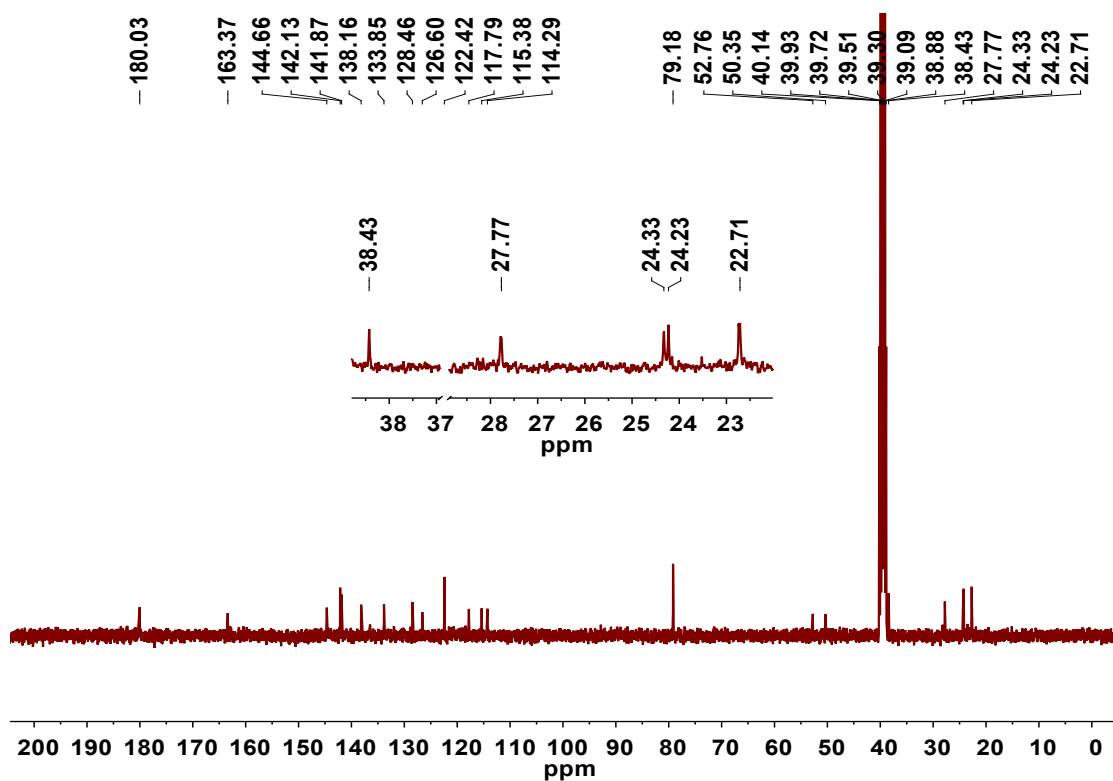

Figure S20.  $^{13}\text{C}\{^1\text{H}\}$ -NMR spectrum of the zwitterionic Pd(II) complex **5** in  $\text{dms0-d}_6$ .

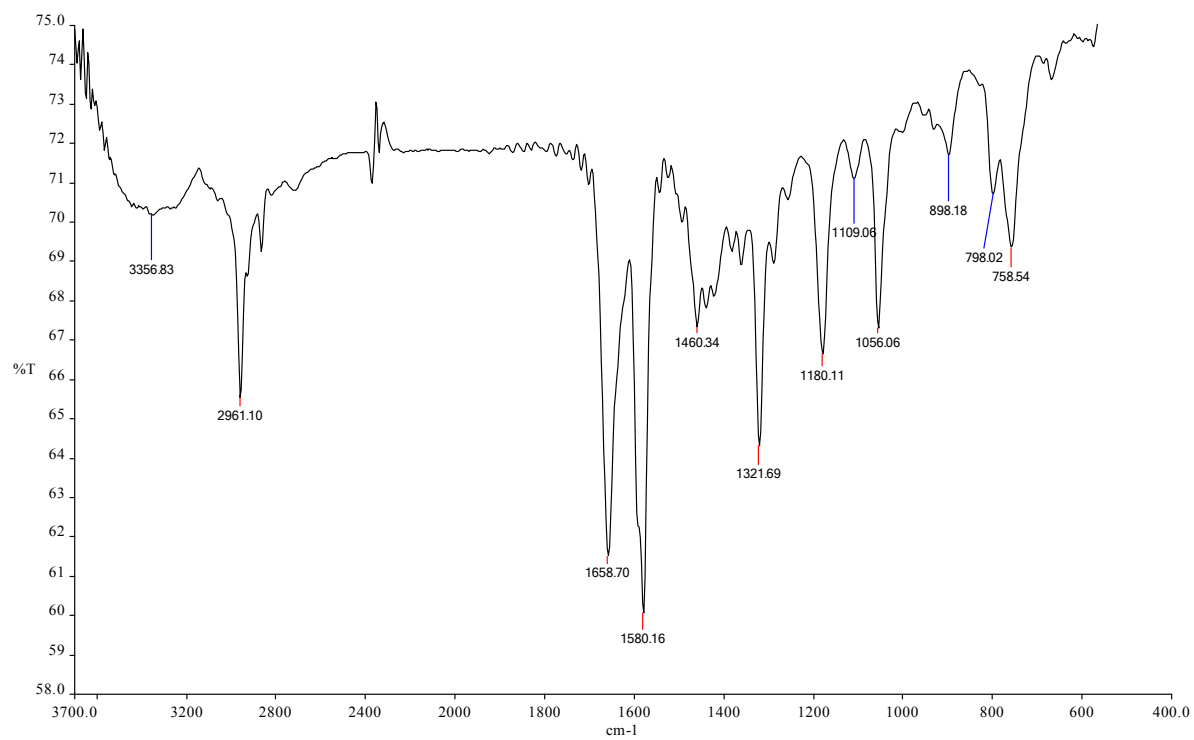

**Figure S21:** FTIR spectrum of the zwitterionic Pd(II) complex 5 recorded as a KBr disc.

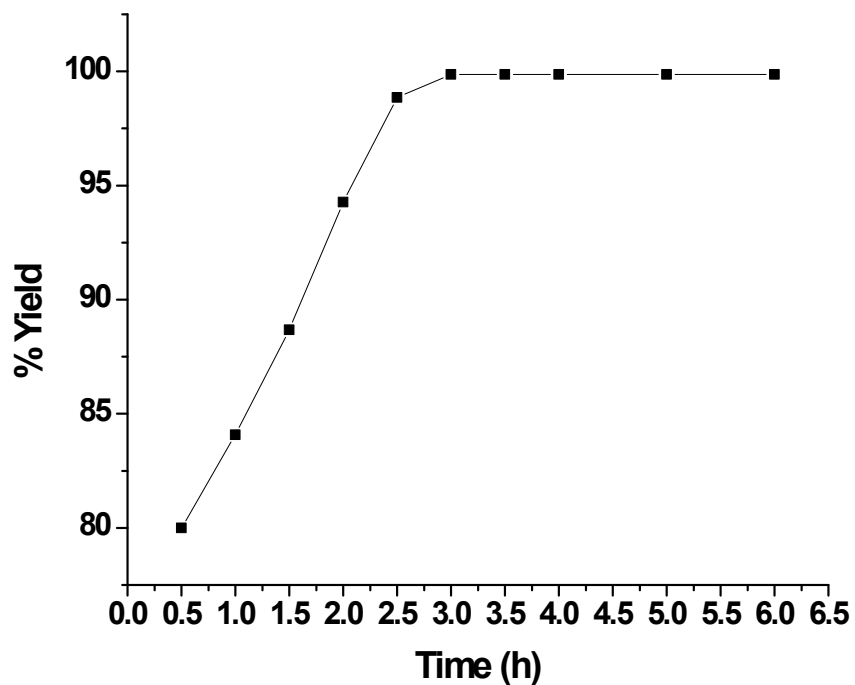

**Figure S22.** Plot of time vs yield for the Suzuki-Miyaura coupling between 4-bromoacetophenone and phenylboronic acid. A round bottom flask containing 4-bromoacetophenone (1 mmol), phenylboronic acid (1.5 mmol),  $K_2CO_3$  (2 mmol), catalyst **3** (0.01 mol%), and  $H_2O$  (1.5 mL) was placed in a oil bath which is already preheated to 100 °C. The reaction was stopped for every 30 minutes, and the product was separated and the yield was calculated as mentioned in the general procedure of the Suzuki reaction.

# X-ray structures

**Table 1** Crystallographic data for  $\text{H}_2\text{L}\cdot\text{H}_2\text{O}$  and  $\text{H}_2\text{L}'$ .

|                                                      | $\text{H}_2\text{L}\cdot\text{H}_2\text{O}$                  | $\text{H}_2\text{L}'$                                       |
|------------------------------------------------------|--------------------------------------------------------------|-------------------------------------------------------------|
| Empirical formula                                    | $\text{C}_{37}\text{H}_{51}\text{N}_5\text{O}$               | $\text{C}_{25}\text{H}_{32}\text{N}_4\text{O}$              |
| Formula weight                                       | 581.83                                                       | 404.55                                                      |
| Wavelength (Å)                                       | 0.71073                                                      | 0.71073                                                     |
| Temperature (K)                                      | 293(2)                                                       | 293(2)                                                      |
| Crystal system                                       | Triclinic                                                    | Triclinic                                                   |
| Space group                                          | $P\bar{1}$                                                   | $P\bar{1}$                                                  |
| $a/\text{Å}$                                         | 10.429(4)                                                    | 9.0287(16)                                                  |
| $b/\text{Å}$                                         | 13.208(5)                                                    | 9.7736(18)                                                  |
| $c/\text{Å}$                                         | 14.228(5)                                                    | 14.728(3)                                                   |
| $\alpha/\text{degree}$                               | 71.233(11)                                                   | 95.194(6)                                                   |
| $\beta/\text{degree}$                                | 84.201(12)                                                   | 91.309(6)                                                   |
| $\gamma/\text{degree}$                               | 76.698(11)                                                   | 113.379(5)                                                  |
| Volume (Å <sup>3</sup> )                             | 1805.1(11)                                                   | 1185.6(4)                                                   |
| $Z$                                                  | 2                                                            | 2                                                           |
| $D_{\text{calcd}}$ , g cm <sup>-3</sup>              | 1.070                                                        | 1.133                                                       |
| $\mu/\text{mm}^{-1}$                                 | 0.065                                                        | 0.071                                                       |
| $F(000)$                                             | 632                                                          | 436                                                         |
| $\theta$ range (degree)                              | 1.51 to 24.87                                                | 2.28 to 25.00                                               |
| Limiting indices                                     | $-11 \leq h \leq 12, -14 \leq k \leq 15, -16 \leq l \leq 16$ | $-9 \leq h \leq 10, -11 \leq k \leq 11, -17 \leq l \leq 17$ |
| Total/ unique no. of reflns.                         | 21315 / 6222                                                 | 14316 / 4163                                                |
| $R_{\text{int}}$                                     | 0.0955                                                       | 0.0529                                                      |
| Data / restr./ params.                               | 6222 / 2 / 401                                               | 4163 / 0 / 278                                              |
| GOF ( $F^2$ )                                        | 1.004                                                        | 1.002                                                       |
| $RI, wR2$                                            | 0.0724, 0.1610                                               | 0.0606, 0.1568                                              |
| $R$ indices (all data) $RI, wR2$                     | 0.1863, 0.2117                                               | 0.1195, 0.1938                                              |
| Largest different peak and hole (e Å <sup>-3</sup> ) | 0.221 and -0.161                                             | 0.526 and -0.273                                            |

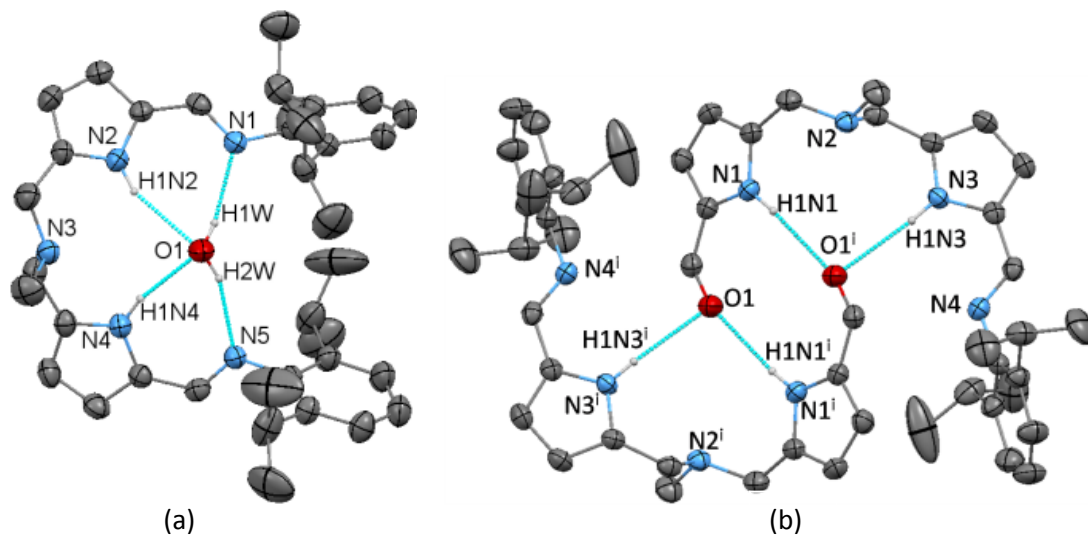

**Figure S23.** The X-ray structure of  $\text{H}_2\text{L}\cdot\text{H}_2\text{O}$  (a) and the hydrolyzed monoimino compound  $\text{H}_2\text{L}'$  which forms the intermolecular hydrogen bonds in the crystal lattice (b). Dotted lines indicate hydrogen bonds. Most hydrogen atoms are omitted for clarity. Selected bond lengths [ $\text{\AA}$ ] and angles [ $^\circ$ ] for  $\text{H}_2\text{L}$ : N2 $\cdots$ O1 2.998(4), H1N2 $\cdots$ O1 2.16(4), N2–H1N2 $\cdots$ O1 159(3), N4 $\cdots$ O1 2.870(4), H1N4 $\cdots$ O1 2.00(4), N4–H1N4 $\cdots$ O1 166(3), O1 $\cdots$ N1 2.842(4), H1W $\cdots$ N1 2.05(2), O1–H1W $\cdots$ N1 163(4), O1 $\cdots$ N5 2.859(4), H2W $\cdots$ N5 2.06(2), O1–H2W $\cdots$ N5 160(4). For  $\text{H}_2\text{L}'$ : N1 $\cdots$ O1<sup>i</sup> 2.988(3), H1N1 $\cdots$ O1<sup>i</sup> 2.16(3), N1–H1N1 $\cdots$ O1<sup>i</sup> 162(3), N3 $\cdots$ O1<sup>i</sup> 3.161(3), H1N3 $\cdots$ O1<sup>i</sup> 2.30(3), N3–H1N3 $\cdots$ O1<sup>i</sup> 176(3). The symmetry operation used to generate equivalent atoms:  $-x+2, -y, -z+1$ .
